# Supplementary material
Source: PubMed Central journal article supplement (PMC7024654)
Supplement: NIHMS1543817-supplement-1.pdf [file NIHMS1543817-supplement-1.pdf]

## Supplementary information

### Appendix: Radiomic features

Table A1. Extracted tumor morphologic features

| <b>Morphologic features</b>        | <b>Qualitative description</b>                                                        | <b>Mathematical description</b>                                                                   |
|------------------------------------|---------------------------------------------------------------------------------------|---------------------------------------------------------------------------------------------------|
| <b>Volume</b>                      | Tumor volume (in mm <sup>3</sup> )                                                    | <i>Total number of voxels</i>                                                                     |
| <b>Perimeter</b>                   | Tumor perimeter (in mm)                                                               | $\sum_i^n \sqrt{\Delta x^2 + \Delta y^2}$                                                         |
| <b>Eccentricity</b>                | Tumor regularity. The quality of fit of an ellipse to the tumor shape <sup>36</sup> . | $\frac{\sum_i \sqrt{(x_e - x_i)^2 + (y_e - y_i)^2}}{\sqrt{(x_i - x_c)^2 + (y_i - y_c)^2}}$<br>$n$ |
| <b>Roundness</b>                   | Tumor roundness                                                                       | $\frac{\text{Area of a shape}}{\text{Area of circle}}$                                            |
| <b>Equivalent spherical radius</b> | Radius of a sphere of an equivalent volume                                            | $\sqrt[3]{\left(\frac{3}{4}\right) V / \pi}$                                                      |

$n$  represents the total number of vertices  $(x_i, y_i)$  in the closed polygon.  $\Delta x = x_{i+1} - x_i$  and  $\Delta y = y_{i+1} - y_i$ . An ellipse fit to the closed polygon shape has coordinates  $(x_e, y_e)$ .

Table A2. Extracted structural texture features

| Structural feature                | Qualitative description                                                           | Mathematical description                                                                                                                                   |
|-----------------------------------|-----------------------------------------------------------------------------------|------------------------------------------------------------------------------------------------------------------------------------------------------------|
| <b>Local Binary Pattern (LBP)</b> | Intensity variation between a pixel and its neighboring pixels <sup>38,39</sup> . | $LBP(x_c, y_c) = \sum_{p=0}^{P-1} q(I_p - I_c) 2^p, (x_p, y_p)$ $= [x_c + Q \cos\left(\frac{2\pi p}{P}\right), y_c - Q \sin\left(\frac{2\pi p}{P}\right)]$ |

$I_c$  and  $I_p$  are gray-level intensity values for pixel  $(x_c, y_c)$  and pixel  $(x_p, y_p)$ .  
 $q$ : indicator function, 0 for negative inputs and 1 for non-negative inputs  
 $Q, P$ : parameters to set pixel neighborhood size, set to 1 and 8, respectively<sup>39,40</sup>.

Table A3. Extracted run-length texture features

| Run-length features                               | Qualitative description                           | Mathematical description                                    |
|---------------------------------------------------|---------------------------------------------------|-------------------------------------------------------------|
| <b>Short run emphasis (SRE)</b>                   | Emphasis on short runs                            | $1/n_r \sum_{i=1}^M \sum_{j=1}^N \frac{R(i,j)}{j^2}$        |
| <b>Long run emphasis (LRE)</b>                    | Emphasis on long runs                             | $1/n_r \sum_{i=1}^M \sum_{j=1}^N (R(i,j)) * j^2$            |
| <b>Gray level nonuniformity (GLN)</b>             | Degree of gray-level run dissimilarity            | $1/n_r \sum_{i=1}^M \left( \sum_{j=1}^N R(i,j) \right)^2$   |
| <b>Run length nonuniformity (RLN)</b>             | Dissimilarity in length of runs                   | $1/n_r \sum_{j=1}^N \left( \sum_{i=1}^M R(i,j) \right)^2$   |
| <b>Run percentage (RP)</b>                        | Distribution of runs                              | $\frac{n_r}{\#pixels}$                                      |
| <b>Low gray level run emphasis (LGRE)</b>         | Emphasis on low-gray-level values                 | $1/n_r \sum_{i=1}^M \sum_{j=1}^N \frac{R(i,j)}{(i+j)^2}$    |
| <b>High gray level run emphasis (HGRE)</b>        | Emphasis on high-gray-level values                | $1/n_r \sum_{i=1}^M \sum_{j=1}^N (R(i,j)) * i^2$            |
| <b>Short run low gray level emphasis (SRLGE)</b>  | Emphasis on short runs with low-gray-level values | $1/n_r \sum_{i=1}^M \sum_{j=1}^N \frac{R(i,j)}{j^2(i+j)^2}$ |
| <b>Short run high gray level emphasis (SRHGE)</b> | Emphasis on short runs with low-gray-level values | $1/n_r \sum_{i=1}^M \sum_{j=1}^N \frac{R(i,j)(i+j)^2}{j^2}$ |
| <b>Long run low gray level emphasis (LRLGE)</b>   | Emphasis on long runs with low-gray-level values  | $1/n_r \sum_{i=1}^M \sum_{j=1}^N \frac{R(i,j)j^2}{(i+j)^2}$ |
| <b>Long run high gray level emphasis (LRHGE)</b>  | Emphasis on long runs with low-gray-level values  | $1/n_r \sum_{i=1}^M \sum_{j=1}^N (R(i,j))(i+j)^2$           |

$n_r$  is the total number of runs,  $R(i,j)$  represents the number of runs with pixels of gray-level intensity value,  $i$ , and length of run,  $j$ . 128 gray-levels were used. Estimated by averaging over  $0^\circ$ ,  $45^\circ$ ,  $90^\circ$ , and  $135^\circ$  orientations.

Table A4. Extracted gray-level co-occurrence matrix texture features

| <b>Co-occurrence features</b> | <b>matrix</b>     | <b>Qualitative description</b>                                       | <b>Mathematical description</b>                                             |
|-------------------------------|-------------------|----------------------------------------------------------------------|-----------------------------------------------------------------------------|
| <b>Contrast</b>               |                   | Intensity contrast between pixel and its neighbor                    | $\sum_{ij}  i - j ^2 f(i, j)$                                               |
| <b>Correlation</b>            |                   | Linear gray-level dependence                                         | $\sum_{ij} \frac{((i - \mu_i) * (j - \mu_j) * f(i, j))}{\sigma_i \sigma_j}$ |
| <b>Homogeneity</b>            |                   | Closeness of distribution in co-occurrence matrix to matrix diagonal | $\sum_{ij} \frac{f(i, j)}{1 +  i - j }$                                     |
| <b>Energy</b>                 |                   | Certainty of gray-level co-occurrence                                | $\sum_{ij} f(i, j)^2$                                                       |
| <b>Entropy</b>                |                   | Uncertainty of gray-level co-occurrence                              | $-\sum_{ij} f(i, j) * \log (f(i, j))$                                       |
| <b>Inverse Moment (IDM)</b>   | <b>Difference</b> | Local homogeneity in gray-level co-occurrence                        | $\sum_{ij} \frac{f(i, j)}{(1 + (i - j)^2)}$                                 |
| <b>Cluster Shade</b>          |                   | Asymmetry in gray-level values                                       | $\sum_{ij} (i - \mu_i + j - \mu_j)^3 * f(i, j)$                             |

Table A5. Extracted gray-level histogram texture features

| <b>Gray-level histogram features</b> | <b>Qualitative description</b>                                                         | <b>Mathematical description</b>                                     |
|--------------------------------------|----------------------------------------------------------------------------------------|---------------------------------------------------------------------|
| <b>Mean</b>                          | Mean gray-level value                                                                  | $\frac{\sum_k k * g(k)}{\sum_k g(k)}$                               |
| <b>Median</b>                        | Median gray-level value                                                                | Median(K)                                                           |
| <b>Min</b>                           | Min gray-level value                                                                   | Min(k)                                                              |
| <b>Max</b>                           | Max gray-level value                                                                   | Max(k)                                                              |
| <b>Interquartile range</b>           | Interquartile range of gray                                                            | $P_{75} - P_{25}$                                                   |
| <b>5<sup>th</sup> Percentile</b>     | Histogram bin that 5% of gray level values are less than or equal to                   | k: 5% of values $\leq k$                                            |
| <b>Mean 5th</b>                      | Mean value of gray-level values that 5% of gray level values are less than or equal to | $\frac{\sum_k k * g(k)}{\sum_k g(k)}$ for $k \leq$ fifth percentile |
| <b>10<sup>h</sup> Percentile</b>     | Histogram bin that 10% of gray level values are less than or equal to                  | k: 10% of values $\leq k$                                           |
| <b>25<sup>th</sup> Percentile</b>    | Histogram bin that 25% of gray level values are less than or equal to                  | k: 25% of values $\leq k$                                           |
| <b>75<sup>th</sup> Percentile</b>    | Histogram bin that 75% of gray level values are less than or equal to                  | k: 75% of values $\leq k$                                           |
| <b>95<sup>th</sup> Percentile</b>    | Histogram bin that 95% of gray level values are greater than or equal to               | k: 95% of values $\geq k$                                           |

|                           |                                                                                            |                                                                             |
|---------------------------|--------------------------------------------------------------------------------------------|-----------------------------------------------------------------------------|
| <b>Mean 95th</b>          | Mean value of gray-level values that 95% of gray level values are greater than or equal to | $\frac{\sum_k k * g(k)}{\sum_k g(k)}$ for $k \geq$ ninety- fifth percentile |
| <b>Sum</b>                | Sum of gray-level values                                                                   | $\sum_k k * g(k)$                                                           |
| <b>Standard deviation</b> | Measure of variation of gray-level values around the mean                                  | $\sqrt{\sum_k (k - \mu)^2 * g(k)}$                                          |
| <b>Entropy</b>            | Measure of histogram nonuniformity                                                         | $-\sum_k g(k) * \log(g(k))$                                                 |
| <b>Kurtosis</b>           | Measure of histogram flatness                                                              | $\sigma^{-4} \sum_k (k - \mu)^4 * g(k) - 3$                                 |
| <b>Skewness</b>           | Measure of histogram symmetry                                                              | $\sigma^{-3} \sum_k (k - \mu)^3 * g(k)$                                     |
| <b>Uniformity</b>         | Measure of histogram uniformity                                                            | $\sum_k g(k)^2$                                                             |

Table A6. Extracted gray-level size zone matrix texture features

| <b>Size zone matrix features</b>           | <b>Qualitative description</b>                                                  | <b>Mathematical description</b>                                          |
|--------------------------------------------|---------------------------------------------------------------------------------|--------------------------------------------------------------------------|
| <b>Gray level mean</b>                     | Measure of mean gray level intensities for zones                                | $\frac{1}{N_s} \sum_{i=1}^{N_g} \sum_{j=1}^{N_z} i p_{ij}$               |
| <b>Gray level non-uniformity</b>           | Measure of the variability of gray-level intensity values                       | $\frac{1}{N_s} \sum_{i=1}^{N_g} s_i^2$                                   |
| <b>Gray level variance</b>                 | Measure of the variance in gray level intensities for the zones                 | $\frac{1}{N_s} \sum_{i=1}^{N_g} \sum_{j=1}^{N_z} (i - \mu)^2 p_{ij}$     |
| <b>High gray level emphasis</b>            | Measure of the distribution of high gray level values                           | $\frac{1}{N_s} \sum_{i=1}^{N_g} s_i i^2$                                 |
| <b>Large zone emphasis</b>                 | Measure of larger zone sizes                                                    | $\frac{1}{N_s} \sum_{j=1}^{N_z} s_j j^2$                                 |
| <b>Large zone high gray level emphasis</b> | Measure of the distributions of larger zone sizes with higher gray level values | $\frac{1}{N_s} \sum_{i=1}^{N_g} \sum_{j=1}^{N_z} i^2 j^2 s_{ij}$         |
| <b>Large zone low gray level emphasis</b>  | Measure of the distributions of larger zone sizes with lower gray level values  | $\frac{1}{N_s} \sum_{i=1}^{N_g} \sum_{j=1}^{N_z} \frac{j^2 s_{ij}}{i^2}$ |
| <b>Low gray level emphasis</b>             | Measure of the distribution of low gray level values                            | $\frac{1}{N_s} \sum_{i=1}^{N_g} \frac{s_i}{i^2}$                         |

|                                            |                                                                                  |                                                                          |
|--------------------------------------------|----------------------------------------------------------------------------------|--------------------------------------------------------------------------|
| <b>Small zone emphasis</b>                 | Measure of smaller zone sizes                                                    | $\frac{1}{N_s} \sum_{j=1}^{N_z} \frac{s_j}{j^2}$                         |
| <b>Small zone high gray level emphasis</b> | Measure of the distributions of smaller zone sizes with higher gray level values | $\frac{1}{N_s} \sum_{i=1}^{N_g} \sum_{j=1}^{N_z} \frac{i^2 s_{ij}}{j^2}$ |
| <b>Small zone low gray level emphasis</b>  | Measure of the distributions of smaller zone sizes with lower gray level values  | $\frac{1}{N_s} \sum_{i=1}^{N_g} \sum_{j=1}^{N_z} \frac{s_{ij}}{i^2 j^2}$ |
| <b>Zone percentage</b>                     | Ratio between the number of zones and number of voxels                           | $\frac{N_s}{N_v}$                                                        |
| <b>Zone size entropy</b>                   | Entropy of zone sizes                                                            | $-\sum_{i=1}^{N_g} \sum_{j=1}^{N_z} p_{ij} \log_2 p_{ij}$                |
| <b>Zone size mean</b>                      | Mean zone size in the image                                                      | $\sum_{i=1}^{N_g} \sum_{j=1}^{N_z} j p_{ij}$                             |
| <b>Zone size non-uniformity</b>            | Measure of variability of zone size volumes in the image                         | $\frac{1}{N_s} \sum_{j=1}^{N_z} s^2 j$                                   |



---

**Zone size variance**

$$\sum_{i=1}^{N_g} \sum_{j=1}^{N_z} (j - \mu)^2 p_{ij}$$

---

$N_g$  is the number of discretized gray levels present in the image,  $N_z$  is the maximum zone size of any group of linked voxels.  $N_s$  is the total number of zones and  $N_v$  is the total number of voxels.  $S_{ij}$  is the number of zones with discretized gray level,  $i$ , and size,  $j$ .

Supplemental figure 1. Summary of patient characteristics from validation cohort. Statistical comparison between discovery and validation cohorts for covariates common in the two datasets.

Supplemental figure 2. Radiomic analysis workflow. 3-D tumor region is automatically segmented from the DCE-MRI scans (A). Signal enhancement ratio (SER) generated using first and second post-contrast DCE-MRI scans (B). Morphologic and texture based radiomic features extracted from the SER map (C).

Supplemental figure 3. Representative cases from heterogeneity phenotypes. Representative slice, tumor region, and SER map from a pre-menopausal woman diagnosed with primary stage-I, HR+, HER2- , node-negative breast cancer assigned to the low heterogeneity phenotype (top), a peri-menopausal woman with primary stage-II, HR-, HER2+, node- negative breast cancer assigned to the medium heterogeneity phenotype (middle), and a pre-menopausal woman with primary stage-II, ER-, HER2-, node-positive breast cancer assigned to the high heterogeneity phenotype (bottom).

Supplemental figure 4. Independent validation of intrinsic imaging phenotypes of tumor heterogeneity. Phenotypes identified in the discovery cohort are significantly reproducible in the validation cohort (A). RFS curves for women stratified by imaging heterogeneity phenotype show that heterogeneity phenotype is statistically significant ( $p = 0.01$ ) when predicting RFS (B).

| <b>a</b>                  |                                                   |                                              |                                                  |
|---------------------------|---------------------------------------------------|----------------------------------------------|--------------------------------------------------|
|                           | <b>Non-recurrent cases<br/>119 (73% of total)</b> | <b>Recurrent cases<br/>44 (27% of total)</b> | Significance tested using<br>Chi-square analysis |
| <b>Receptor status</b>    |                                                   |                                              | <b>p=0.07</b>                                    |
| Hormone receptor positive | 67 (56%)                                          | 25 (56%)                                     |                                                  |
| HER2 positive             | 34 (29%)                                          | 18 (40%)                                     |                                                  |
| Triple Negative           | 29 (24%)                                          | 10 (23%)                                     |                                                  |
| <b>b</b>                  |                                                   |                                              |                                                  |
|                           | <b>Discovery<br/>n=95</b>                         | <b>Validation<br/>n= 163</b>                 | Significance tested using<br>Chi-square analysis |
| <b>Recurrent cases</b>    |                                                   |                                              |                                                  |
|                           | 11 (12%)                                          | 44 (27%)                                     | <b>p = 0.02</b>                                  |
| <b>Receptor Status</b>    |                                                   |                                              |                                                  |
| Hormone receptor positive | 70 (74%)                                          | 92 (56%)                                     | <b>p = 0.02</b>                                  |
| HER2 positive             | 22 (23%)                                          | 52 (32%)                                     | <b>P=0.3</b>                                     |
| Triple Negative           | 12 (13%)                                          | 39 (24%)                                     | <b>p=0.4</b>                                     |
| <b>Clinical stage</b>     |                                                   |                                              | <b>p &lt; 0.001</b>                              |
| Early stage (1)           | 36 (38%)                                          | 0 (0%)                                       |                                                  |
| Advanced Stage (2-3)      | 55 (58%)                                          | 163 (100%)                                   |                                                  |

Supplemental figure 1. Summary of patient characteristics from validation cohort. Statistical comparison between discovery and validation cohorts for covariates common in the two datasets.

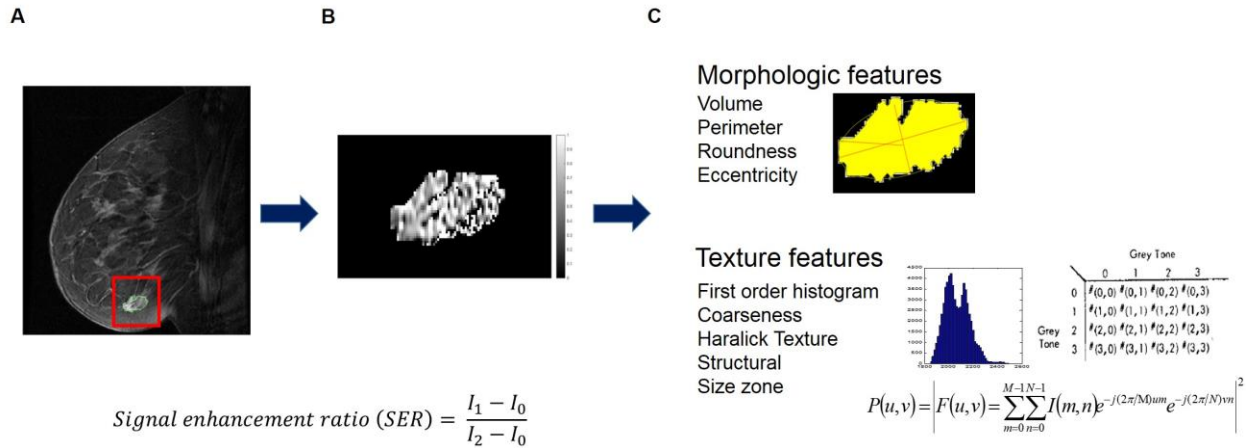

Supplemental figure 2. Radiomic analysis workflow. 3-D tumor region is automatically segmented from the DCE-MRI scans (A). Signal enhancement ratio (SER) generated using first and second post-contrast DCE-MRI scans (B). Morphologic and texture based radiomic features extracted from the SER map (C).

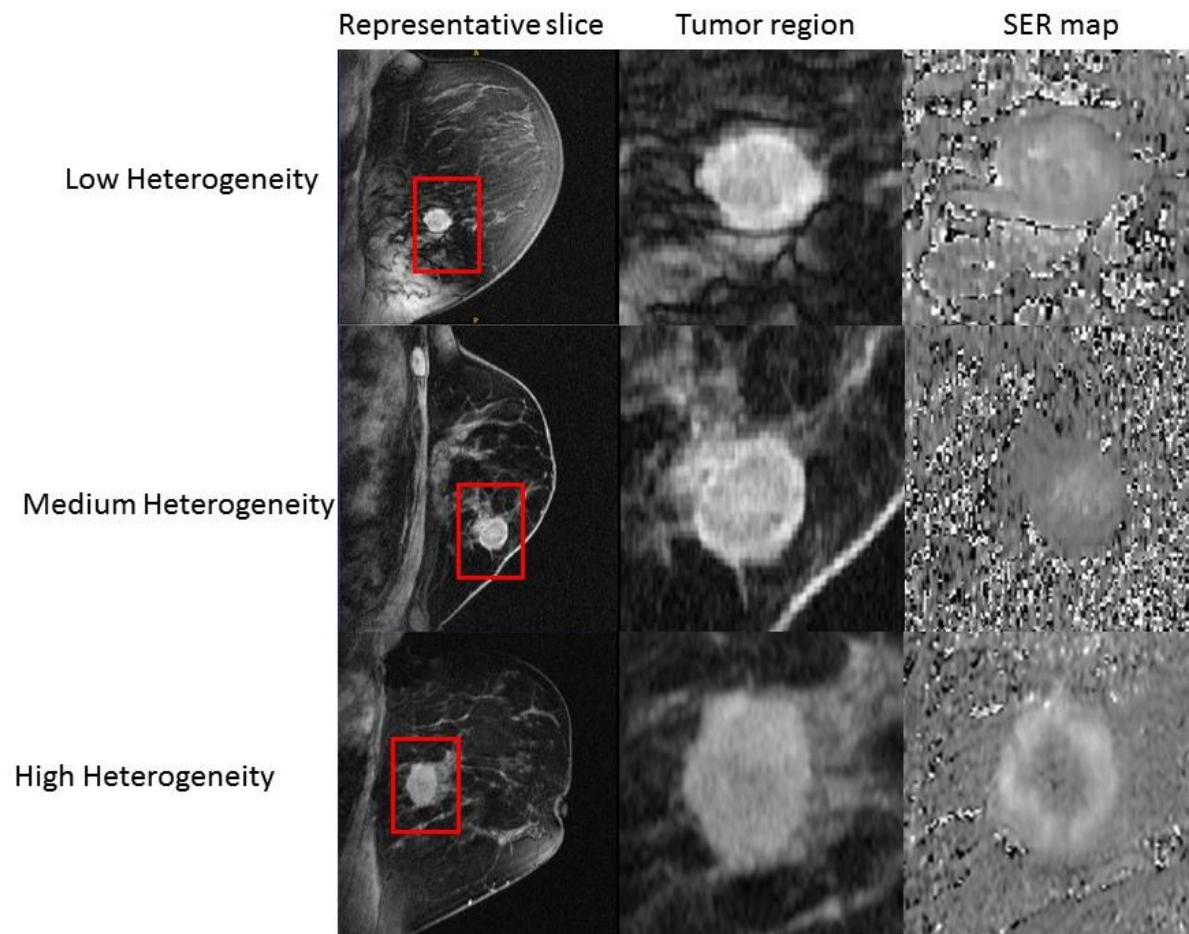

Supplemental figure 3. Representative cases from heterogeneity phenotypes. Representative slice, tumor region, and SER map from a pre-menopausal woman diagnosed with primary stage-I, HR+, HER2- , node-negative breast cancer assigned to the low heterogeneity phenotype (top), a peri-menopausal woman with primary stage-II, HR-, HER2+, node- negative breast cancer assigned to the medium heterogeneity phenotype (middle), and a pre-menopausal woman with primary stage-II, ER-, HER2-, node-positive breast cancer assigned to the high heterogeneity phenotype (bottom).

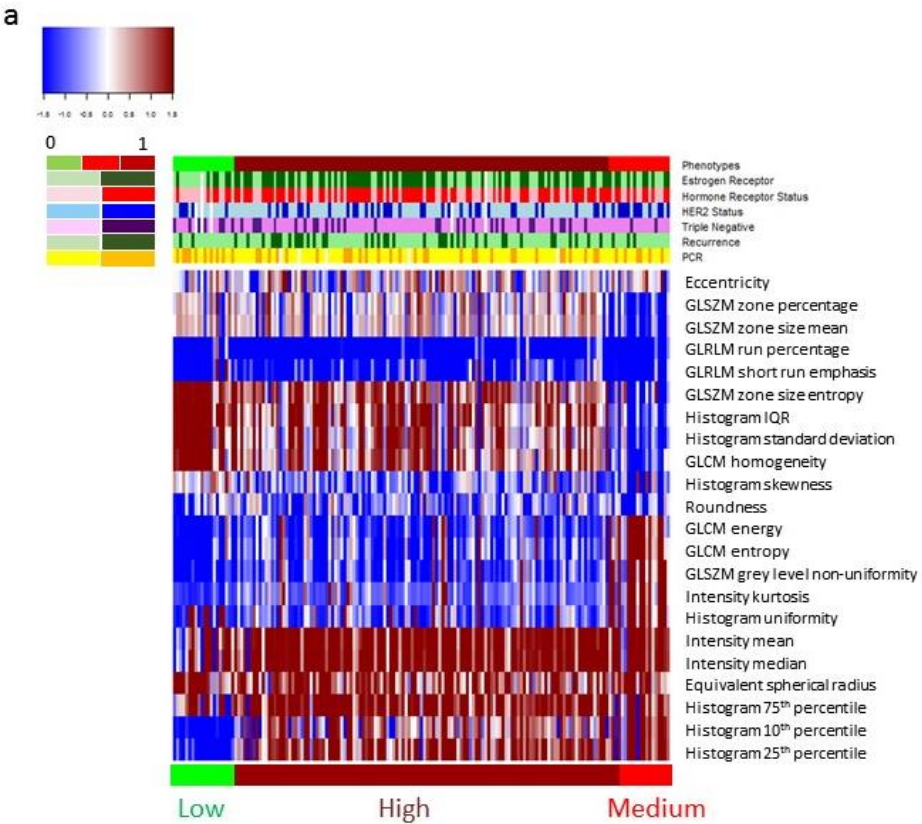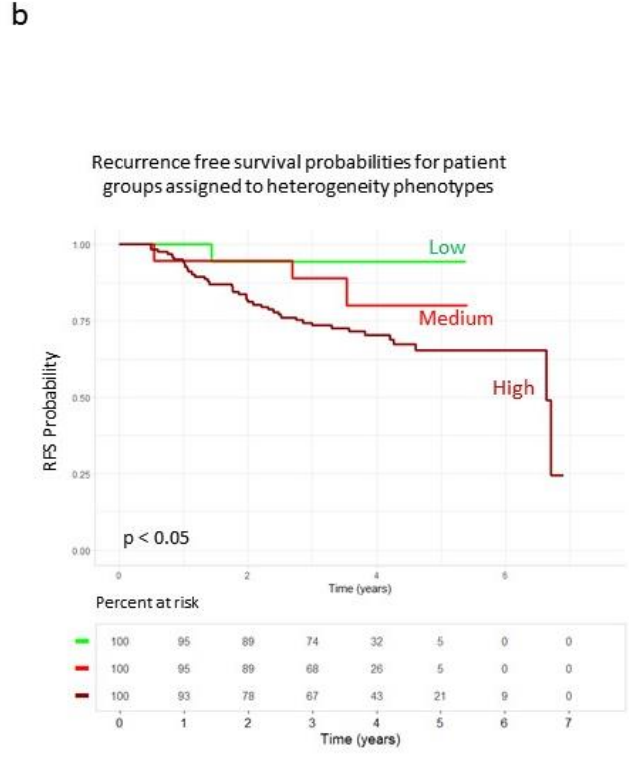

Supplemental figure 4. Independent validation of intrinsic imaging phenotypes of tumor heterogeneity. Phenotypes identified in the discovery cohort are significantly reproducible in the validation cohort (A). RFS curves for women stratified by imaging heterogeneity phenotype show that heterogeneity phenotype is statistically significant ( $p = 0.01$ ) when predicting RFS (B).
